# Supplementary material for: Function-based Intersubject Alignment of Human Cortical Anatomy
Source: PubMed Central journal article supplement — Cereb Cortex. 2009 May 6;20(1):130–40. doi: 10.1093/cercor/bhp085 (PMC2792192; doi:10.1093/cercor/bhp085), 2009-05-06
Supplement: bhp085_1.pdf [file bhp085_1.pdf]

**Supplemental material (online)**

|                                         | <u>Movie Part 1</u> |            | <u>Movie Part 2</u> |            |
|-----------------------------------------|---------------------|------------|---------------------|------------|
|                                         | AN                  | FN(P2=>P1) | AN                  | FN(P1=>P2) |
| Number of significant correlations      |                     |            |                     |            |
| Whole brain                             | 19776               | 24899      | 20435               | 25670      |
| % increase with functional registration |                     |            |                     |            |
| Whole brain                             | 25.9% ± 2.4%        |            | 25.6% ± 2.8%        |            |

Table S1. Number of cortical nodes with significant between-subject correlations ( $r > 0.10$ ,  $p < 0.01$  after correction of df for temporal autocorrelation) for time series obtained while subjects watched one-half of *Raiders of the Lost Ark* after anatomical normalization (AN) and after functional normalization based on the other half of the movie (FN(P1=>P2) and FN(P2=>P1)). The change in the number of significant correlations also is shown as a percent increase.

|                                                                             | <u>Movie Part 1</u> |            | <u>Movie Part 2</u> |            |
|-----------------------------------------------------------------------------|---------------------|------------|---------------------|------------|
|                                                                             | AN                  | FN(P2=>P1) | AN                  | FN(P1=>P2) |
| Proportion of cortical voxels with significant between-subject correlations |                     |            |                     |            |
| Whole brain                                                                 | 24.2%               | 29.4%      | 25.2%               | 30.4%      |
| % increase with functional registration                                     |                     |            |                     |            |
| Whole brain                                                                 | 21.5% ± 2.1%        |            | 20.6% ± 2.0%        |            |

Table S2. Proportion of cortical voxels with significant between-subject correlations ( $r > 0.10$ ,  $p < 0.01$  after correction of  $df$  for temporal autocorrelation) of time series obtained while subjects watched one-half of *Raiders of the Lost Ark* after anatomical normalization (AN) and after functional normalization based on the other half of the movie (FN(P1=>P2) and FN(P2=>P1)). The change in the proportion of voxels with significant correlations also is shown as a percent increase. Data from the warped cortical surfaces were resampled into the voxels in the original three-dimensional brain image volumes by averaging correlations for all nodes that intersected with each voxel. Cortical voxels were those that intersected with at least one node in the cortex model.

|                              | TN    | AN           | FN(P2=>P1)   |
|------------------------------|-------|--------------|--------------|
| <u>Movie Part 2</u>          |       |              |              |
| Significant correlations     | 17323 | 20435        | 23041        |
| % increase with registration |       | 17.6% ± 8.0% | 32.6% ± 3.5% |

Table S3. Number of cortical nodes with significant between-subject correlations ( $r > 0.10$ ,  $p < 0.01$  after correction of df for temporal autocorrelation) for time series obtained while subjects watched the second half of *Raiders of the Lost Ark* after Talairach normalization (TN), as implemented in Freesurfer, after anatomical normalization based on cortical curvature (AN), which uses Talairach normalization as its initialization point, and after functional normalization, using the same Talairach normalization as the initialization point. As in the previous functional normalization that used the curvature-based normalization as the initialization point (Table S1), functional normalizations are fully cross-validated by applying the warp based on the second half of the movie to the time-series data from the first half of the movie (FN(P2=>P1)). The change in the number of significant correlations also is shown as a percent increase for both anatomic curvature-based normalization and function-based normalization relative to Talairach normalization.

|                                         | <u>Face and object perception experiment</u> |                  |                  |
|-----------------------------------------|----------------------------------------------|------------------|------------------|
|                                         | AN                                           | FN(P2=>face/obj) | FN(P1=>face/obj) |
| Number of significant correlations      |                                              |                  |                  |
| Whole brain                             | 6779                                         | 8005             | 7925             |
| Ventral temporal cortex                 | 1330                                         | 1538             | 1539             |
|                                         |                                              |                  |                  |
| % increase with functional registration |                                              |                  |                  |
| Whole brain                             |                                              | 18.1% ± 3.1%     | 16.9% ± 3.8%     |
| Ventral temporal cortex                 |                                              | 15.6% ± 1.2%     | 15.7% ± 2.9%     |

Table S3. Number of cortical nodes with significant between-subject correlations ( $r > 0.10$ ,  $p < 0.01$  after correction of df for temporal autocorrelation) for time series obtained while subjects viewed still images of faces and objects after anatomical normalization (AN) and after functional normalization based on the two parts of the movie (FN(P1=>face/obj) and FN(P2=>face/obj)). The change in the number of significant correlations also is shown as a percent increase.

---

|                                         | <u>Face and object perception experiment</u> |                  |                  |
|-----------------------------------------|----------------------------------------------|------------------|------------------|
|                                         | AN                                           | FN(P2=>face/obj) | FN(P1=>face/obj) |
| <hr/>                                   |                                              |                  |                  |
| Number of significant t-tests           |                                              |                  |                  |
| Whole brain                             | 3980                                         | 4527             | 4550             |
| Ventral temporal cortex                 | 631                                          | 838              | 826              |
|                                         |                                              |                  |                  |
| % increase with functional registration |                                              |                  |                  |
| Whole brain                             |                                              | 13.7%            | 14.3 %           |
| Ventral temporal cortex                 |                                              | 32.8%            | 30.9%            |

---

Table S4. Number of cortical nodes with significant t-tests for the contrast faces versus objects ( $|t| > 2.36$ ,  $p < 0.01$ ) anatomical normalization (AN) and after functional normalization based on the two parts of the movie (FN(P1=>face/obj) and FN(P2=>face/obj)). The change in the number of significant t-tests also is shown as a percent increase.

|                                         | <u>Movie Part 1</u> |             | <u>Movie Part 2</u> |             |
|-----------------------------------------|---------------------|-------------|---------------------|-------------|
|                                         | AN                  | FN(F/O=>P1) | AN                  | FN(F/O=>P2) |
| Number of significant correlations      |                     |             |                     |             |
| Whole brain                             | 19776               | 20936       | 20435               | 21569       |
| Ventral temporal                        | 2004                | 2210        | 1848                | 1986        |
| % increase with functional registration |                     |             |                     |             |
| Whole brain                             | 5.9 ± 1.1%          |             | 5.5% ± 0.8%         |             |
| Ventral temporal                        | 10.3% ± 2.2%        |             | 10.4% ± 3.2%        |             |

Table S5. Number of cortical nodes with significant between-subject correlations ( $r > 0.10$ ,  $p < 0.01$  after correction of df for temporal autocorrelation) for time series obtained while subjects watched one-half of *Raiders of the Lost Ark* after anatomical normalization (AN) and after functional normalization based on time series from the face and object perception experiment (FN(F/O=>P1) and FN(F/O=>P2)). The change in the number of significant correlations also is shown as a percent increase.

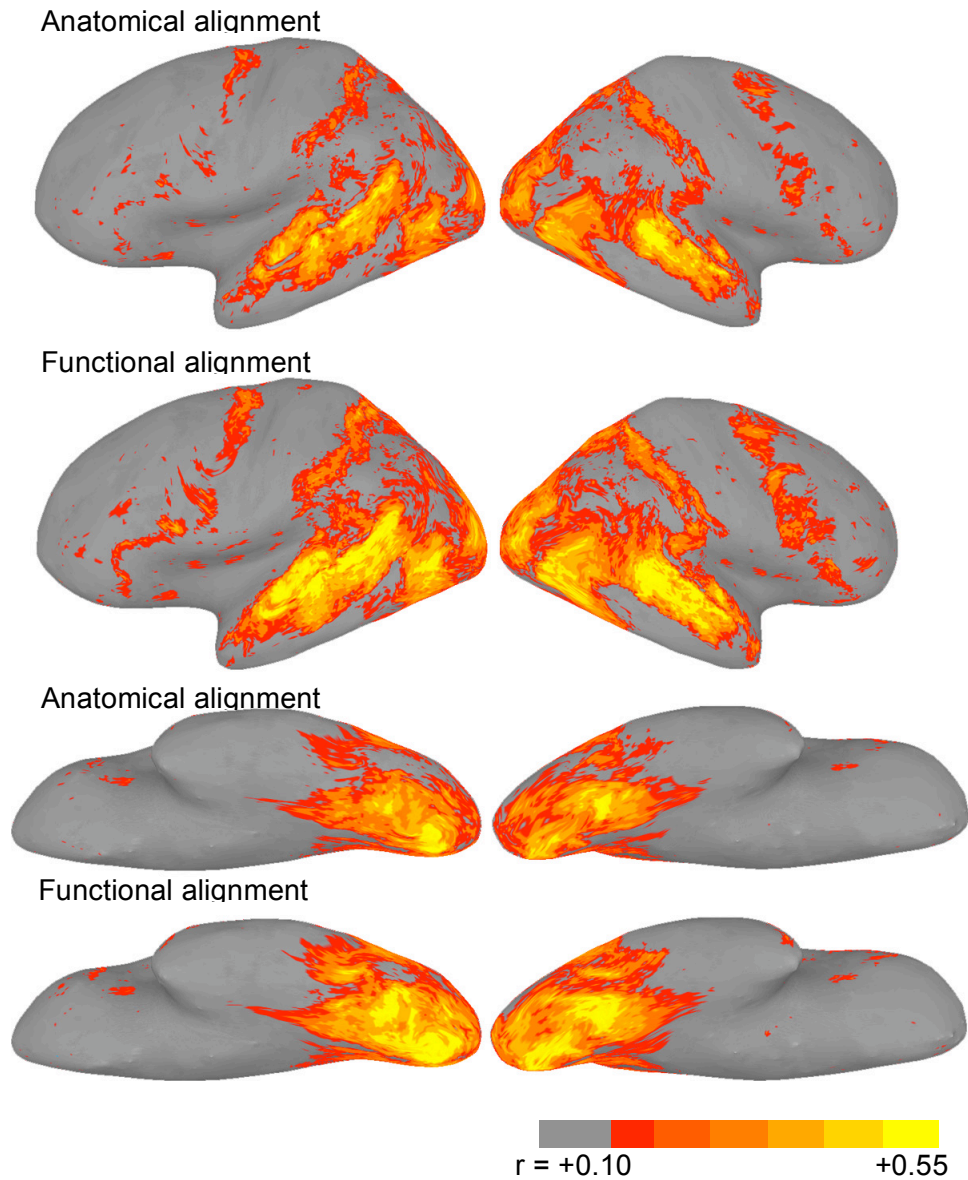

Figure S1. Generalization to the second half of the movie – lateral and ventral views. The upper images in each section show the mean correlation of each subject with the other nine subjects for corresponding nodes after anatomical cortical registration. The lower images in each section show mean correlations after applying the warps to these nodes that maximized functional similarity in the first half of the movie (cross-validation test). Correlations less than  $+0.10$  ( $p < 0.01$ ) are not shown.

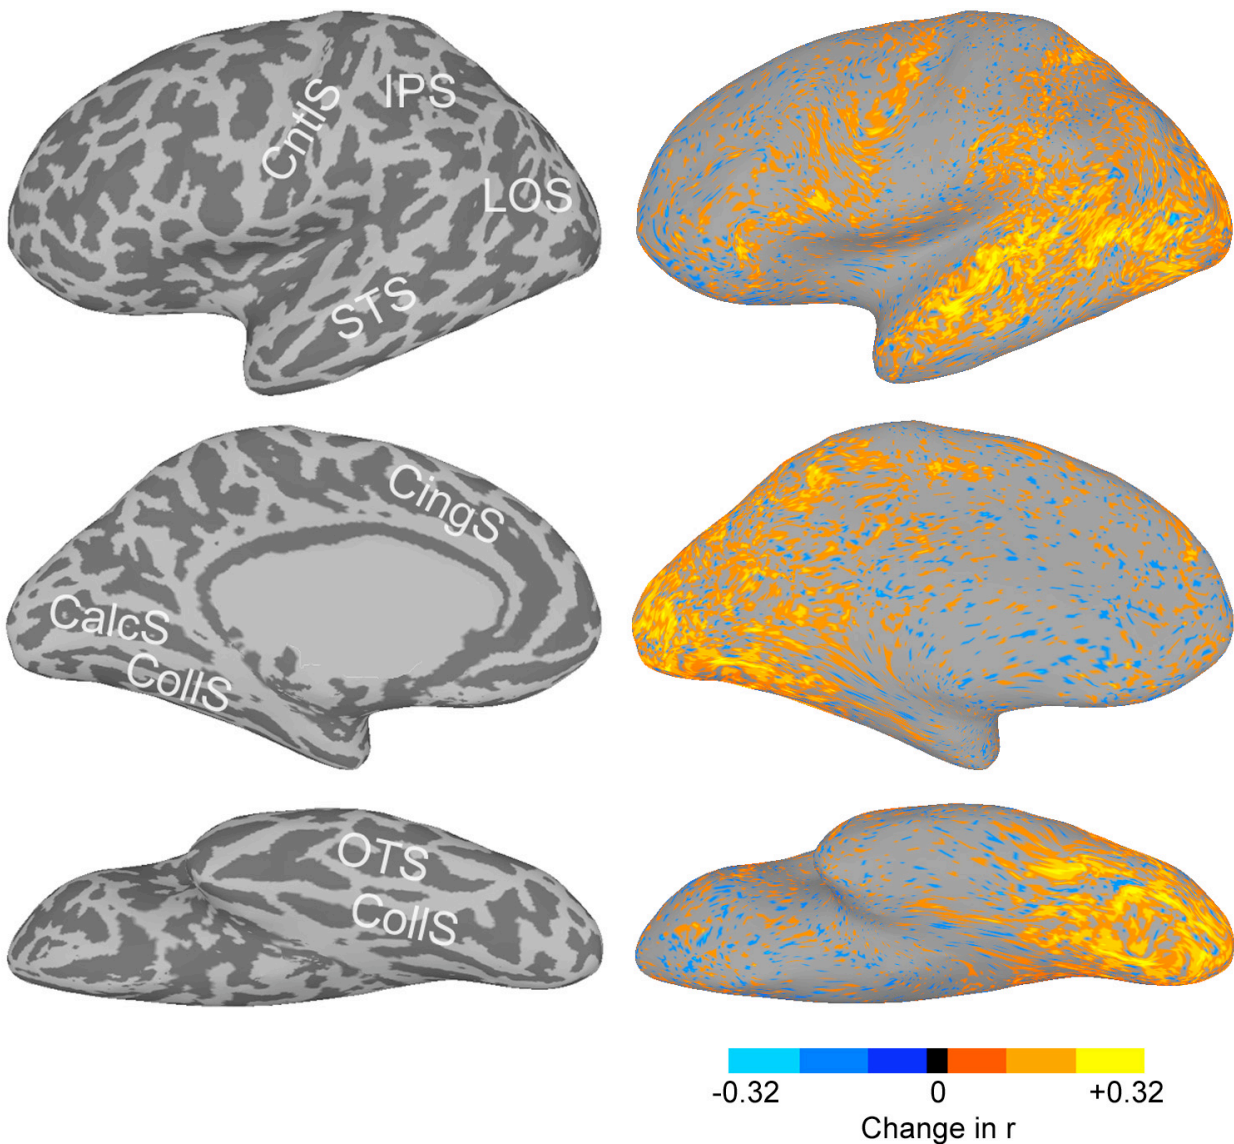

**Figure S2.** Plot of changes in correlation in the left hemisphere that resulted by functionally aligning the data from part 1 of the movie based on a warp derived from data from part 2 of the movie. Only changes in correlation of  $\pm 0.03$  are shown in color. Note that increases in correlation are found in the same occipital, temporal, parietal, and premotor cortices that showed significant between-subject correlations after anatomical or functional alignment (Figures 2 and S1). Areas that did not show between-subject correlations, such as primary sensorimotor and prefrontal cortices also did not change in correlation with functional alignment.



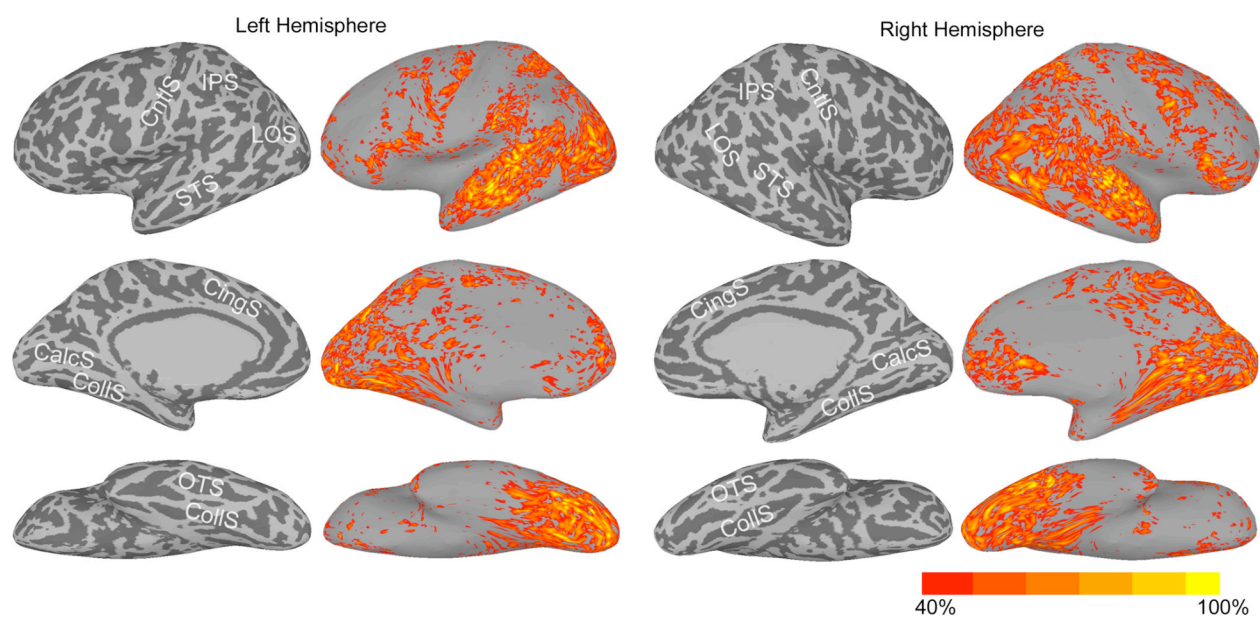

**Figure S3. Mean absolute value of expansion or compression of cortex that resulted from functionally aligning data. Note that the greatest expansion and contraction is seen in the cortices that show the largest increases in between-subject correlation with functional alignment (Figures 1, S1, and S2).**

**S1 Energy terms***Correlation energy term*

Let  $\bar{s}_i^v = \bar{t}_i^v - \mu_i^v$ , where  $\mu_i^v$  is the mean value of the time-series. Then the alignment measure (between subjects  $i$  and  $j$ ) can be written as:

$$E_c(i, j) = \sum_v \hat{r}(\bar{t}_i^v, \bar{t}_j^v) = \sum_v \frac{\langle \bar{s}_i^v, \bar{s}_j^v \rangle}{|\bar{s}_i^v| |\bar{s}_j^v|},$$

where  $\hat{r}$  is the sample correlation,  $\langle \cdot, \cdot \rangle$  is the inner product and  $|\cdot|$  denotes the magnitude of a vector.

*Folding penalty term*

Let  $A_{uvw}$  denote the oriented area of the mesh triangle  $\Delta$  that consists of mesh nodes  $u, v$  and  $w$  ( $u > v >$

$w$ );  $\bar{x}_j^{uv} = \bar{x}_j^v - \bar{x}_j^u$  is the vector pointing from node  $u$  to node  $v$ , and  $\bar{n}_j^u = \frac{\bar{x}_j^u}{|\bar{x}_j^u|}$  is the surface normal at

node  $u$ . Let's define the oriented area as:

$$A_j^\Delta = A_j^{uvw} = \bar{x}_j^{uv} \times \bar{x}_j^{uw} \cdot \frac{\bar{n}_j^u}{2}.$$

Let  $A_{j0}^\Delta$  denote the oriented area of triangle  $\Delta$  in subject  $j$ 's regularized mesh (i.e., at time = 0). Similar to

Fischl et al (1999b), we define the folding penalty term as:

$$E_f = \frac{1}{3} \sum_v \sum_{\Delta \in \mathcal{T}_v} (A_j^\Delta - A_{j0}^\Delta)^2 I(A_j^\Delta, A_{j0}^\Delta),$$

where  $I(A, B)$  is equal to 1 if both arguments are the same sign, 0 otherwise. In other words, if a mesh triangle is folded, the penalty is proportional to the difference between the current area and original area. Otherwise, it is zero. We used a folding penalty term of 30.

### *Metric distortion penalty term*

Let  $d_{vu}^j(t)$  denote the Euclidean distance between two mesh nodes  $u$  and  $v$  on subject  $j$  at iteration  $t$ . Note that  $t = 0$  corresponds to the original regular mesh. Then the metric distortion penalty is defined as:

$$E_m = \frac{1}{2} \sum_v \sum_{u \in N_v} (d_{vu}^j(t) - d_0)^2 .$$

We used a metric distortion penalty term of 30.

## **S2 Renormalizing the Warps in Group-wise Registration**

Let  $\bar{x}_j^v$  denote the spatial location of node  $v$  in subject  $j$ . At anatomical alignment (i.e. before we run our functional registration), each node  $v$  has the same coordinate value  $\bar{x}_0^v$ . However, after each pair-wise functional registration of a subject  $j$  with its corresponding template,  $\bar{x}_j^v$  is typically changed. Notice that one can apply a common invertible spatial transformation  $\Phi(\cdot)$  to *all* the subjects without altering the correspondence between subjects. In an effort to remove this ambiguity, we impose the additional constraint that the average spatial location across all  $N$  subjects at each cortical node is zero, i.e.,

$\frac{1}{N} \sum_{j=1}^N \bar{x}_j^v = \bar{x}_0^v$ , for each  $v$ , where  $N$  is the number of subjects. An efficient, though suboptimal, method

to satisfy this constraint is to subtract off the average node displacement from each subject's displacement warp after each pair-wise registration. In this framework, the spatial location of node  $v$  in subject  $j$  is

modified to  $\bar{x}_j^v - \bar{W}^v$ , where the correction  $\bar{W}^v$  is given by  $\bar{W}^v = \frac{1}{N} \sum_{j=1}^N (\bar{x}_j^v - \bar{x}_0^v)$ .
